# Supplementary material for: Influence of DP and MMD of the pulps used in the Ioncell® process on processability and fiber properties
Source: Royal Society of Chemistry journal article supplement (doi:10.1039/d3su00013c), 2023-01-01
Supplement: d3su00013c2.pdf [file d3su00013c2.pdf]

## **Influence of DP and MMD of the pulps used in the Ioncell® process on processability and fibre properties**

Yibo Ma<sup>1§</sup>. Xiang You<sup>1</sup>. Kaarlo Nieminen<sup>1</sup>. Daisuke Sawada<sup>1</sup>. Herbert Sixta<sup>1\*</sup>

Corresponding author: \*[Herbert.sixta@aalto.fi](mailto:Herbert.sixta@aalto.fi), §[angeless1115@gmail.com](mailto:angeless1115@gmail.com)

1. Department of Bioproducts and Biotechnology, School of Chemical Engineering, Aalto University, P.O. Box 16300,00076 Aalto, Finland

### Table of Contents

|                                                                                                                                                               |           |
|---------------------------------------------------------------------------------------------------------------------------------------------------------------|-----------|
| <b>1. Kinetics of DP adjustment.....</b>                                                                                                                      | <b>2</b>  |
| <b>2. Relationship of the intrinsic viscosity and pretreatment on the high MW fraction of the pulps .....</b>                                                 | <b>4</b>  |
| <b>3. Comprehensive data on the pulp properties and the corresponding rheological properties. spinning conditions and the resulting fibre properties.....</b> | <b>5</b>  |
| <b>4. Selection of the pulp viscosity and dope concentration for optimum dope spinnability .....</b>                                                          | <b>7</b>  |
| <b>5. Fibre properties.....</b>                                                                                                                               | <b>8</b>  |
| <b>6. Crystallite properties of the spun fibres .....</b>                                                                                                     | <b>9</b>  |
| <b>7. References.....</b>                                                                                                                                     | <b>10</b> |

## 1. Kinetics of DP adjustment

In the rate equation describing the DP degradation kinetics of cellulose under acidic aqueous conditions, a distinction is made between the number of amorphous segments with regularly (M) and weakly (W) linked glycosidic bonds. The assumption of first-order reactions leads to the following description of the time evolution of M (regular linkages) and W (weak linkages) and the number of chain cleavages  $DP_0/DP - 1$ :

$$\begin{aligned}\frac{dM}{dt} &= -k_1 M & \frac{dH_1}{dt} &= k_1 M \\ \frac{dW}{dt} &= -k_2 W & \frac{dH_2}{dt} &= k_2 W\end{aligned}\quad (S1)$$

$H_1$  and  $H_2$  stand for the number of scissions in the regularly and weakly linked subcategories.  $k_1$  is rate constant for the hydrolysis reaction in regularly linked part  
 $k_2$  represents rate constant for the fast reaction for weakly linked elements

Solving the simple differential equations leads to expressions of  $H_1$  and  $H_2$  which comprise the total number of scissions on that chain. Since  $n$  scissions on average reduce the length of the chain by a factor of  $(n+1)$  the chain length development can be expressed in equation (S2) as:

$$DP = \frac{DP_0}{H_1 + H_2 + 1} \quad (S2)$$

The initial variables of M and W are  $M_0$  and  $W_0$ . Thus, the simple differential equations can be solved, and by calculating the DP value from the intrinsic viscosities, the number of chain scissions per cellulose molecule  $CS_V$  can be calculated with  $DP_0/DP - 1$  using equation (S3) <sup>1</sup>:

$$CS_V = \left( \frac{DP_0}{DP} - 1 \right) = M_0(1 - e^{-k_1 t}) + W_0(1 - e^{-k_2 t}) \quad (S3)$$

The kinetics of chain cleavage  $CS_V$  by an enzyme treatment can be described by the Michaelis-Menten equation according to equation (S4) <sup>2</sup>:

$$CS_V = CS_{v,max} \frac{[EG]}{([EG] + K_M)} \quad (S4)$$

With  $CS_{v,max}$  is the maximum chain scission,  $[EG]$  is the endoglucanase charge and  $K_M$  is the Michaelis constant.

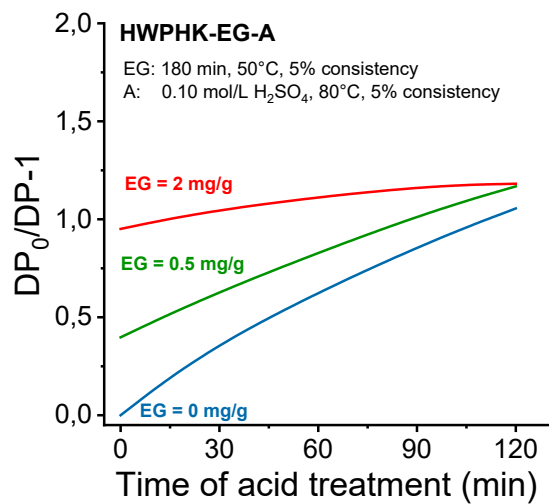

Figure S1: The chain scission rate of cellulose during successive endoglucanase and acid treatments as a function of the duration of acid treatment.

## 2. Relationship of the intrinsic viscosity and pretreatment on the high MW fraction of the pulps

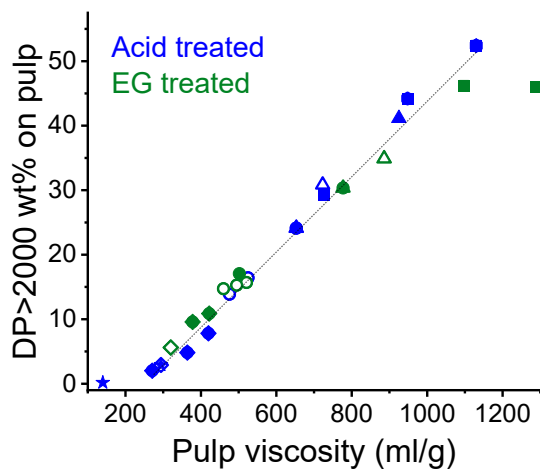

Figure S2: Relationship between the weight fraction of cellulose chains with a DP greater than 2000 and the intrinsic viscosity

### 3. Comprehensive data on the pulp properties and the corresponding rheological properties, spinning conditions and the resulting fibre properties.

**Table S1.** Summary table of dope rheological properties, spinning conditions and fibre mechanical properties. The spinning was carried out with 200 holes spinneret; 100 µm diameter; L/D = 0.2; extrusion velocity = 3.5 m/min; temperature of coagulation bath = 10°C.

| Raw material   | Pretreatment     | Intrinsic Viscosity ml/g | Dope conc. | Zero shear viscosity Pa.s | COP    | Moduli Pa | Spinning temp. | Max. DR | Titer dtex | draw ratio | Dry tenacity cN/tex | Dry tenacity STDV ± | Dry tenacity MPa | Dry elong. % | Dry elong. STDV ± | Wet tenacity cN/tex | Wet tenacity STDV ± | wet elong. % | Wet elong. STDV ± |
|----------------|------------------|--------------------------|------------|---------------------------|--------|-----------|----------------|---------|------------|------------|---------------------|---------------------|------------------|--------------|-------------------|---------------------|---------------------|--------------|-------------------|
| Rayonier HV+   | loncell-P + acid | 1130                     | 5 %        | 53627                     | 0.06   | 759.5     | Not spinnable  | -       |            |            |                     |                     |                  |              |                   |                     |                     |              |                   |
| Rayonier HV+   | loncell-P + acid | 1130                     | 6 %        | 25630                     | 0.13   | 781.0     | Not spinnable  | -       |            |            |                     |                     |                  |              |                   |                     |                     |              |                   |
| Rayonier HV+   | loncell-P + acid | 1130                     | 9 %        | 103220                    | 0.06   | 1682.3    | 85             | 10      | 1.29       | 8          | 56.86               | 3.32                | 852.9            | 10.54        | 1.20              | 52.04               | 3.78                | 12.13        | 1.28              |
| Rayonier HV+   | loncell-P + acid | 1130                     | 10 %       | 81278                     | 0.08   | 1651.0    | 80             | 9       | 1.15       | 9          | 59.16               | 2.78                | 887.4            | 10.98        | 0.84              | 52.26               | 4.47                | 12.32        | 1                 |
| Rayonier HV+   | loncell-P + acid | 948                      | 11 %       | 117870                    | 0.0762 | 2176.4    | 80             | 11      | 1.13       | 10         | 53.48               | 4.61                | 802.2            | 11.68        | 1.41              | 49.45               | 3.91                | 13.97        | 1.75              |
| Rayonier HV+   | loncell-P + acid | 948                      | 8 %        | 42484                     | 0.12   | 1090.3    | Not spinnable  | -       |            |            |                     |                     |                  |              |                   |                     |                     |              |                   |
| Rayonier HV+   | loncell-P + acid | 948                      | 10 %       | 87564                     | 0.13   | 2239.7    | 80             | 11      | 1.21       | 9          | 59.29               | 3.42                | 889.35           | 11.82        | 1.25              | 55.03               | 3.26                | 14.61        | 1.33              |
| Rayonier HV+   | loncell-P + acid | 726                      | 12 %       | 96062                     | 0.13   | 2549.5    | 75             | 13      | 1.16       | 11         | 56.05               | 3.16                | 840.75           | 12.93        | 1.12              | 51.33               | 4.39                | 14.32        | 1.63              |
| Rayonier HV+   | loncell-P + acid | 726                      | 9 %        | 31670                     | 0.25   | 1651.6    | 60             | 13      | 1.28       | 9          | 54.05               | 4.56                | 810.75           | 8.75         | 1.08              | 48.78               | 5.14                | 11.21        | 1.06              |
| Rayonier HV+   | loncell-P + acid | 726                      | 10 %       | 51334                     | 0.00   | 2729.7    | 70             | 16      | 1.26       | 9          | 55.28               | 6.02                | 829.2            | 11.18        | 1.47              | 47.6                | 4.53                | 11.92        | 1.54              |
| Rayonier HV+   | loncell-P + EG   | 1288                     | 9 %        | 82272                     | 0.0696 | 1426.7    | 90             | 10      | 1.16       | 9          | 56.32               | 5.82                | 844.8            | 10.46        | 1.58              | 52.16               | 4.45                | 11.68        | 1.8               |
| Rayonier HV+   | loncell-P + EG   | 1288                     | 10 %       | 184230                    | 0.0364 | 2040.1    | 85             | 10      | 1.22       | 10         | 57.23               | 4.84                | 858.45           | 11.06        | 1.65              | 52.26               | 5.05                | 11.02        | 1.47              |
| Rayonier HV+   | loncell-P + EG   | 1098                     | 9 %        | 78720                     | 0.0853 | 1663.8    | 85             | 12      | 1.14       | 9          | 54.34               | 4.73                | 815.1            | 9.83         | 1.07              | 47.63               | 5.93                | 11.5         | 1.94              |
| Rayonier HV+   | loncell-P + EG   | 1098                     | 10 %       | 90454                     | 0.093  | 1887.7    | 85             | 14      | 1.12       | 10         | 55.75               | 5.8                 | 836.25           | 11.03        | 1.76              | 51.04               | 4.9                 | 12           | 1.92              |
| Rayonier HV+   | loncell-P + EG   | 886                      | 11 %       | 54309                     | 0.1615 | 1646.2    | 85             | 14      | 1.16       | 10         | 50.51               | 3.87                | 757.65           | 10.79        | 1.94              | 46.11               | 3.08                | 13.32        | 1.62              |
| Rayonier HV+   | loncell-P + EG   | 886                      | 12 %       | 126890                    | 0.0665 | 1803.4    | 85             | 12      | 1.17       | 11         | 51.43               | 3.70                | 771.45           | 11.94        | 1.47              | 47.73               | 5.87                | 13.2         | 1.42              |
| Rayonier 92 mv | loncell-P + EG   | 777                      | 12 %       | 115470                    | 0.0792 | 1976.1    | 85             | 14      | 1.20       | 11         | 51.22               | 2.63                | 768.3            | 13.6         | 1.98              | 48.33               | 6.43                | 14.56        | 2.72              |
| Rayonier 92 mv | loncell-P + EG   | 777                      | 13 %       | 70674                     | 0.1975 | 2409.7    | 90             | 15      | 1.21       | 12         | 52.26               | 2.82                | 783.9            | 13.56        | 1.54              | 51.71               | 6.02                | 13.37        | 2.55              |
| Bracell        | -                | 653                      | 11 %       | 28363                     | 0.60   | 2822.0    | 80             | 19      | 1.04       | 11         | 55.22               | 3.29                | 828.3            | 10.35        | 1.04              | 48.42               | 5                   | 13.12        | 1.87              |
| Bracell        | -                | 653                      | 13 %       | 65859                     | 0.32   | 3692.7    | 80             | 17      | 1.11       | 12         | 55.64               | 4.69                | 834.6            | 11.84        | 1.84              | 50.24               | 3.99                | 12.63        | 1.89              |
| Bracell        | -                | 653                      | 12 %       | 29817                     | 0.68   | 3288.1    | 85             | 17      | 1.07       | 12         | 54.29               | 6.58                | 814.35           | 11.35        | 2.1               | 49.22               | 3.28                | 12.86        | 1.74              |
| Bracell        | acid             | 525                      | 13 %       | 30864                     | 0.85   | 4029.2    | 80             | 16      | 1.19       | 12         | 50.55               | 5.23                | 758.25           | 10.22        | 1.21              | 45.17               | 6.65                | 11.5         | 1.97              |
| Bracell        | acid             | 525                      | 14 %       | 68560                     | 0.40   | 4244.6    | 75             | 18      | 1.19       | 13         | 54.19               | 2.97                | 812.85           | 11.61        | 1.2               | 48.5                | 5.08                | 14.12        | 1.68              |
| Bracell        | acid             | 476                      | 13 %       | 37553                     | 0.68   | 4028.0    | 70             | 16      | 1.31       | 11         | 55.1                | 2.9                 | 826.5            | 12.14        | 1.17              | 48.52               | 3.34                | 13.38        | 0.98              |
| Bracell        | acid             | 476                      | 14 %       | 22833                     | 1.25   | 4365.8    | 80             | 17      | 1.16       | 13         | 56.37               | 2.92                | 845.55           | 11.93        | 1.46              | 50.07               | 4.09                | 14.55        | 1.19              |
| Bracell        | acid             | 420                      | 14 %       | 17496                     | 1.68   | 4535.1    | 70             | 16      | 1.25       | 12         | 53.57               | 2.73                | 803.55           | 10.11        | 1.19              | 46.01               | 3.14                | 11           | 1.3               |
| Bracell        | acid             | 420                      | 15 %       | 24703                     | 1.38   | 5285.8    | 75             | 17      | 1.17       | 14         | 51.84               | 4.44                | 777.6            | 10.99        | 1.82              | 47.88               | 3.44                | 12.86        | 1.33              |

|         |         |     |      |        |        |        |                  |    |      |    |       |      |        |       |      |       |      |       |      |
|---------|---------|-----|------|--------|--------|--------|------------------|----|------|----|-------|------|--------|-------|------|-------|------|-------|------|
| Bracell | acid    | 364 | 14 % | 30899  | 0.80   | 4952.0 | 60               | 15 | 1.2  | 13 | 50.84 | 3.56 | 762.6  | 9.51  | 1.06 | 45.92 | 2.97 | 11.08 | 0.94 |
| Bracell | acid    | 364 | 15 % | 26000  | 1.24   | 5414.7 | 65               | 14 | 1.26 | 13 | 52.92 | 2.83 | 793.8  | 11.6  | 1.11 | 46.18 | 4.56 | 12.47 | 1.61 |
| Bracell | acid    | 294 | 16 % | 26812  | 1.69   | 4563.7 | 75               | 11 | 2.24 | 11 | 34.58 | 5.09 | 518.7  | 8.75  | 0.86 | 27.48 | 3.39 | 10.05 | 1.5  |
| Bracell | acid    | 294 | 17 % | 56246  | 0.80   | 4621.9 | 70               | 11 | 1.64 | 11 | 45.11 | 4.53 | 676.65 | 10.33 | 1.61 | 38.04 | 3.58 | 11.7  | 1.78 |
| Bracell | acid    | 271 | 15 % | 14833  | 2.01   | 5815.1 | 60               | 13 | 1.33 | 13 | 44.8  | 4.84 | 672    | 8.4   | 1.61 | 39.52 | 3.76 | 9.82  | 0.94 |
| Bracell | acid    | 271 | 14 % | 7428.7 | 4.61   | 5545.9 | 60               | 15 | 1.08 | 14 | 45.2  | 3.93 | 678    | 9.13  | 1.36 | 38.76 | 4.11 | 9.56  | 1.08 |
| Bracell | acid    | 140 | 13 % | -      | -      | -      | Not<br>spinnable | -  |      |    |       |      |        |       |      |       |      |       |      |
| Bracell | acid    | 140 | 17 % | -      | 24.343 | 20140  | 45               | 4  |      |    |       |      |        |       |      |       |      |       |      |
| Bracell | acid    | 140 | 20 % | -      | -      | -      | 60               | 4  |      |    |       |      |        |       |      |       |      |       |      |
| Bracell | EG      | 521 | 13 % | 33181  | 0.7574 | 2779.8 | 80               | 17 | 1.27 | 11 | 49.74 | 3.7  | 746.1  | 12.1  | 1.55 | 42.11 | 3.73 | 13.2  | 2.22 |
| Bracell | EG      | 521 | 14 % | 33048  | 0.774  | 3311.2 | 80               | 15 | 1.24 | 13 | 49.93 | 4.06 | 748.95 | 11.72 | 1.55 | 46.46 | 2.32 | 14.69 | 1.37 |
| Bracell | EG      | 460 | 14 % | 34393  | 0.64   | 3047.5 | 75               | 15 | 1.22 | 12 | 47.05 | 3.94 | 705.75 | 10.79 | 1.44 | 41.56 | 4.26 | 13.08 | 2.01 |
| Bracell | EG      | 460 | 13 % | 19294  | 1.34   | 3541.0 | 80               | 14 | 1.26 | 12 | 45.15 | 5.34 | 677.25 | 11.92 | 2.49 | 42.01 | 4.17 | 13.7  | 2.52 |
| Bracell | EG+acid | 495 | 13 % | 21351  | 1.1552 | 3533.8 | 75               | 18 | 1.19 | 12 | 53.69 | 2.78 | 805.35 | 13.2  | 1.51 | 47.61 | 4.42 | 14.2  | 1.46 |
| Bracell | EG+acid | 495 | 14 % | 38416  | 0.643  | 3402.4 | 80               | 20 | 1.17 | 13 | 51.71 | 4.75 | 775.65 | 10.57 | 1.57 | 47.12 | 5.35 | 12.51 | 1.76 |
| Bracell | EG+acid | 422 | 14 % | 25288  | 1.014  | 3939.6 | 70               | 18 | 1.15 | 13 | 53.77 | 3.6  | 806.55 | 10.03 | 1.22 | 47.05 | 4.49 | 11.95 | 1.46 |
| Bracell | EG+acid | 422 | 15 % | 37100  | 0.789  | 4604.1 | 75               | 20 | 1.36 | 12 | 51.69 | 4.66 | 775.35 | 11.46 | 2.04 | 46.11 | 4.6  | 13.29 | 1.77 |
| Bracell | EG+acid | 378 | 14 % | 18608  | 1.3897 | 2938.3 | 75               | 16 | 1.26 | 12 | 49.27 | 3.39 | 739.05 | 11.88 | 1.59 | 42.16 | 4.92 | 13.76 | 2.22 |
| Bracell | EG+acid | 378 | 15 % | 29678  | 1.0586 | 3415.8 | 80               | 16 | 1.22 | 13 | 47.05 | 4.36 | 705.75 | 11.67 | 1.49 | 40.3  | 3.74 | 12.54 | 1.17 |
| Bracell | EG+acid | 320 | 15 % | 25638  | 1.33   | 4787.1 | 70               | 17 | 1.16 | 14 | 49.92 | 3.09 | 748.8  | 10.43 | 0.98 | 42.92 | 3.71 | 13.21 | 7.6  |
| Bracell | EG+acid | 320 | 16 % | 45405  | 0.827  | 4215.1 | 75               | 19 | 1.24 | 14 | 48.51 | 4.85 | 727.65 | 10.72 | 1.81 | 41.84 | 3.5  | 11.93 | 1.93 |

#### 4. Selection of the pulp viscosity and dope concentration for optimum dope spinnability

The optimum spinnability was found for pulps with an intrinsic viscosity of 550 (460 - 770) at 13 wt% pulp concentration and 430 mL/g (300 - 520) at 14 wt% pulp concentration as shown in Figure S3.

The associated rheological characteristics here are  $\omega$  ranging from 0.7 rad/s (0.2 - 1.3) to 1.1 rad/s (0.4 - 2.5), the  $G'=G''$  ranging from 3300 Pa (2400 - 4200) to 4000 Pa (2800 - 5500) and the complex viscosity  $\eta_0^*$  ranging from 36000 Pa.s (19000 - 70000) to 29000 Pa.s (12000 - 65000).

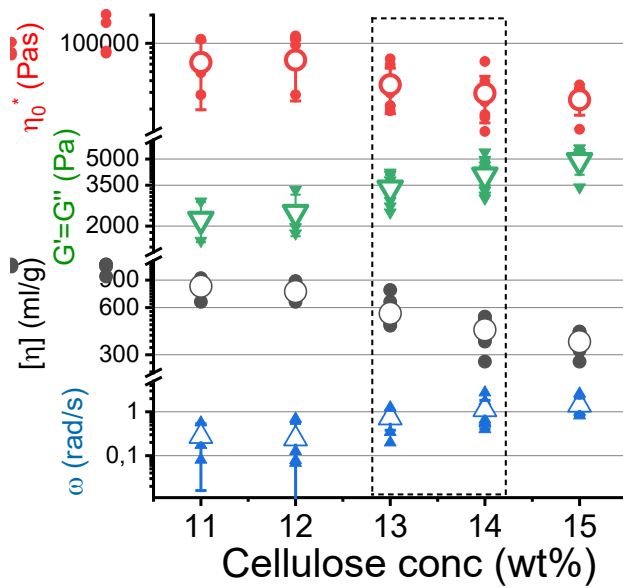

Figure S3: The pulp viscosity and the pulp concentration in the dope are related to the corresponding rheological properties of the spinning dopes. The optimum range of pulp concentration in the dope is between 13 and 14 wt%, which lead to the best spinning performances.

## 5. Fibre properties

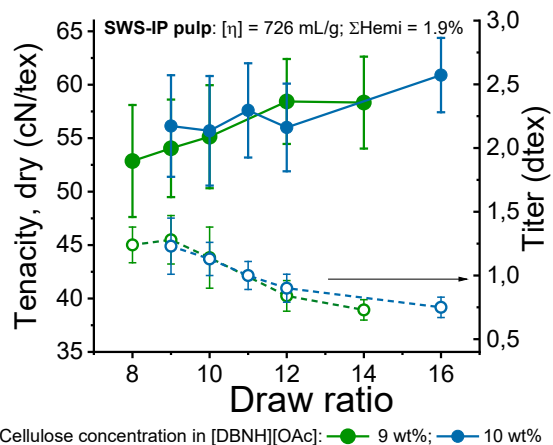

Figure S4. Conditioned fiber properties, tenacity, elongation and titer as a function of the draw ratio of a SWS-IP pulp with a viscosity of 726 mL/g. Spinning conditions: 10 wt% dope concentration, spinning temperature = 70°C; rheology at spinning temperature:  $\eta_0^* = 51\,334 \text{ Pa}\cdot\text{s}$ ;  $\omega = 0.26 \text{ rad/s}$ ;  $G' = G'' = 2678 \text{ Pa}$ ; spinneret: 200 holes, 100  $\mu\text{m}$  diameter,  $L/D = 0.2$ ; extrusion velocity = 3.5 m/min, temperature of coagulation bath = 10°C.

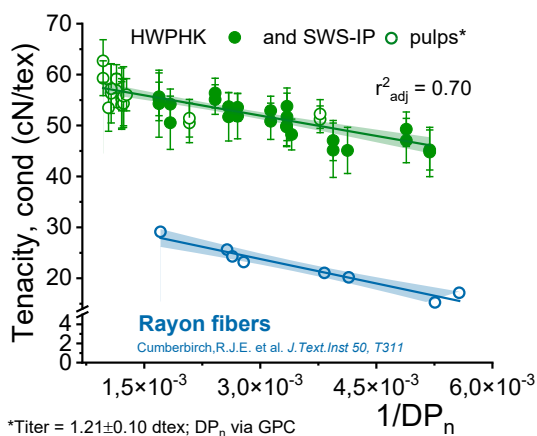

Figure S5: Conditioned tenacity of Ioncell fibers with titers of  $1.21 \pm 0.10 \text{ dtex}$  made from SWS-IP and HWPBK pulps and Rayon fibers published by Cumberbirch et al. as a function of the reciprocal  $DP_n^3$ .



## 6. Crystallite properties of the spun fibres

Table S2. Crystallite properties of the selected spun fibres

| Sample   | Intrinsic Viscosity ml/g | Titer dtex | HERMANS orientation Function | Crystallinity % | L1-10 Å | L110 Å | L020 Å |
|----------|--------------------------|------------|------------------------------|-----------------|---------|--------|--------|
| Rayonier | 1130                     | 1.15       | 0.576                        | 51.0            | 37.0    | 35.6   | 38.0   |
| Rayonier | 1098                     | 1.12       | 0.738                        | 54.9            | 42.2    | 35.7   | 35.7   |
| Rayonier | 886                      | 1.16       | 0.763                        | 56.1            | 40.7    | 36.1   | 35.1   |
| Rayonier | 777                      | 1.21       | 0.73                         | 57.4            | 42.1    | 35.1   | 38.1   |
| Rayonier | 726                      | 1.16       | 0.646                        | 51.0            | 40.0    | 34.8   | 31.1   |
| Bracell  | 525                      | 1.19       | 0.623                        | 52.0            | 37.3    | 34.2   | 36.8   |
| Bracell  | 521                      | 1.24       | 0.801                        | 54.8            | 39.4    | 35.0   | 36.1   |
| Bracell  | 476                      | 1.31       | 0.522                        | 49.0            | 39.7    | 37.2   | 37.9   |
| Bracell  | 460                      | 1.22       | 0.779                        | 55.9            | 39.5    | 35.4   | 37.8   |
| Bracell  | 422                      | 1.36       | 0.800                        | 56.6            | 40.4    | 36.3   | 37.6   |
| Bracell  | 420                      | 1.17       | 0.631                        | 52.7            | 32.9    | 34.0   | 29.4   |
| Bracell  | 320                      | 1.16       | 0.785                        | 56.5            | 41.5    | 36.4   | 39.0   |
| Bracell  | 271                      | 1.08       | 0.763                        | 53.6            | 39.0    | 34.8   | 36.4   |

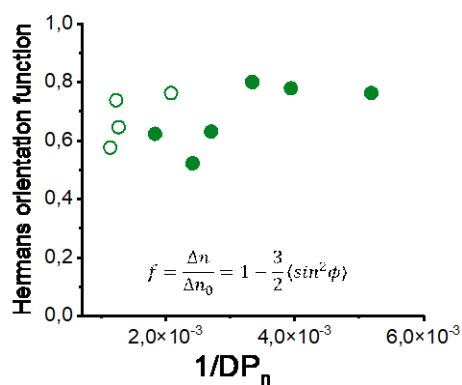

Figure S6. Hermans orientation function of the Ioncell fibers made from SWS-IP (open circles) and HWPHK pulps (full circles) as a function of the DP<sub>n</sub>.

## 7. References

- 1 D. J. Mozdyniewicz, K. Nieminen, G. Kraft and H. Sixta, *Cellulose*, 2016, **23**, 213–229.
- 2 V. Gehmayr and H. Sixta, *Biomacromolecules*, 2012, **13**, 645–651.
- 3 R. J. E. Cumberbirch and W. G. Harland, *J Text Inst Trans*, 1959, **50**, T311–T334.
